# Supplementary material for: Straightforward synthesis of Solomon-red-BAPTA as NIR fluorescent sensors via metal-free oxidative coupling
Source: RSC Adv. 2026 Jun 1;16(32):29450–7. doi: 10.1039/d6ra01589a (PMC13227500; doi:10.1039/d6ra01589a)
Supplement: RA-016-D6RA01589A-s002 [file RA-016-D6RA01589A-s002.xlsx]

## Sheet: 20260321_FL_Ph
Module:	UV-Vis
Path:	1.0 mm
Software:	3.8.1
Firmware:
Sample ID	User ID	Date	Time	Baseline	Cursor 1 Pos.	Cursor 1 Abs.	Cursor 2 Pos.	Cursor 2 Abs.	Measure Type	Serial#	Config.	Norm nm	Norm Abs	220	223	226	229	232	235	238	241	244	247	250	253	256	259	262	265	268	271	274	277	280	283	286	289	292	295	298	301	304	307	310	313	316	319	322	325
100uM KZ845	Default	2026.03.22.	16:09	0,000	405	0,017	700	0,476	Measure	USB2G34660BG149	0,980094/-0,89/64/16	NaN	NaN	0.217	0.234	0.218	0.213	0.204	0.185	0.166	0.146	0.131	0.114	0.104	0.092	0.088	0.087	0.088	0.09	0.091	0.091	0.091	0.092	0.092	0.091	0.088	0.085	0.083	0.08	0.079	0.078	0.077	0.081	0.089	0.094	0.102	0.112	0.118	0.121
MES pH 5,5 10uM KZ845	Default	2026.03.22.	16:14	0,000	405	0,000	711	0,056	Measure	USB2G34660BG149	0,980094/-0,89/64/16	NaN	NaN	-0.05	-0.046	-0.042	-0.046	-0.047	-0.046	-0.047	-0.042	-0.037	-0.026	-0.021	-0.018	-0.017	-0.017	-0.019	-0.02	-0.022	-0.026	-0.029	-0.03	-0.032	-0.034	-0.037	-0.036	-0.034	-0.031	-0.027	-0.021	-0.014	-0.007	0	0.003	0.005	0.006	0.007	0.006
MES pH 6,5 10uM KZ845	Default	2026.03.22.	16:14	0,000	405	-0,000	711	0,060	Measure	USB2G34660BG149	0,980094/-0,89/64/16	NaN	NaN	-0.04	-0.033	-0.033	-0.041	-0.042	-0.042	-0.043	-0.04	-0.035	-0.025	-0.021	-0.017	-0.016	-0.016	-0.018	-0.02	-0.021	-0.024	-0.027	-0.028	-0.03	-0.032	-0.035	-0.035	-0.033	-0.028	-0.026	-0.02	-0.014	-0.007	0	0.003	0.005	0.006	0.005	0.006
HEPES pH 7,4 10uM KZ845	Default	2026.03.22.	16:15	0,000	405	0,000	711	0,054	Measure	USB2G34660BG149	0,980094/-0,89/64/16	NaN	NaN	-0.016	-0.02	-0.028	-0.035	-0.037	-0.041	-0.042	-0.038	-0.034	-0.025	-0.021	-0.016	-0.016	-0.016	-0.018	-0.019	-0.021	-0.024	-0.027	-0.029	-0.03	-0.033	-0.035	-0.035	-0.032	-0.029	-0.026	-0.02	-0.014	-0.007	-0.001	0.002	0.005	0.006	0.006	0.007
TRIS pH 8,5 10uM KZ845	Default	2026.03.22.	16:16	0,000	405	0,003	711	0,042	Measure	USB2G34660BG149	0,980094/-0,89/64/16	NaN	NaN	-0.043	-0.03	-0.026	-0.032	-0.033	-0.035	-0.036	-0.031	-0.027	-0.017	-0.013	-0.009	-0.009	-0.009	-0.01	-0.012	-0.014	-0.018	-0.022	-0.022	-0.025	-0.028	-0.03	-0.03	-0.027	-0.026	-0.023	-0.017	-0.01	-0.004	0.002	0.003	0.006	0.007	0.007	0.006
TRIS pH 8,5 10uM KZ845	Default	2026.03.22.	16:16	0,000	405	-0,000	711	0,042	Measure	USB2G34660BG149	0,980094/-0,89/64/16	NaN	NaN	-0.058	-0.049	-0.045	-0.047	-0.049	-0.049	-0.047	-0.042	-0.037	-0.027	-0.023	-0.018	-0.018	-0.018	-0.019	-0.022	-0.023	-0.026	-0.029	-0.03	-0.032	-0.034	-0.037	-0.037	-0.036	-0.031	-0.028	-0.023	-0.017	-0.009	-0.003	0.001	0.002	0.003	0.002	0.002
TRIS pH 9,6 10uM KZ845	Default	2026.03.22.	16:16	0,000	405	0,000	711	0,045	Measure	USB2G34660BG149	0,980094/-0,89/64/16	NaN	NaN	-0.052	-0.046	-0.04	-0.044	-0.046	-0.046	-0.047	-0.042	-0.037	-0.026	-0.021	-0.018	-0.018	-0.018	-0.019	-0.021	-0.023	-0.027	-0.029	-0.031	-0.033	-0.035	-0.037	-0.037	-0.035	-0.033	-0.029	-0.024	-0.016	-0.008	-0.004	0	0.002	0.003	0.003	0.003
TRIS pH 9,6 100uM KZ845	Default	2026.03.22.	16:20	0,000	405	0,018	711	0,409	Measure	USB2G34660BG149	0,980094/-0,89/64/16	NaN	NaN	0.083	0.097	0.1	0.093	0.085	0.073	0.061	0.054	0.051	0.051	0.051	0.048	0.045	0.044	0.043	0.042	0.04	0.037	0.034	0.032	0.03	0.026	0.021	0.018	0.019	0.023	0.027	0.033	0.04	0.051	0.062	0.069	0.076	0.082	0.086	0.089
TRIS pH 8,5 100uM KZ845	Default	2026.03.22.	16:21	0,000	405	0,013	711	0,555	Measure	USB2G34660BG149	0,980094/-0,89/64/16	NaN	NaN	0.161	0.156	0.158	0.143	0.13	0.108	0.092	0.083	0.079	0.08	0.079	0.079	0.076	0.078	0.078	0.077	0.074	0.068	0.063	0.056	0.051	0.045	0.039	0.037	0.036	0.038	0.041	0.048	0.058	0.069	0.079	0.087	0.097	0.107	0.114	0.118
HEPES pH 7,4 100uM KZ845	Default	2026.03.22.	16:22	0,000	405	0,023	711	0,686	Measure	USB2G34660BG149	0,980094/-0,89/64/16	NaN	NaN	0.257	0.232	0.223	0.213	0.195	0.166	0.147	0.128	0.119	0.111	0.107	0.099	0.093	0.093	0.092	0.091	0.089	0.086	0.082	0.077	0.074	0.069	0.063	0.06	0.059	0.06	0.065	0.072	0.081	0.093	0.107	0.116	0.128	0.137	0.145	0.15
MES pH 6,5 100uM KZ845	Default	2026.03.22.	16:22	0,000	405	0,018	711	0,599	Measure	USB2G34660BG149	0,980094/-0,89/64/16	NaN	NaN	0.195	0.179	0.178	0.167	0.153	0.129	0.111	0.102	0.094	0.09	0.087	0.082	0.078	0.076	0.076	0.075	0.073	0.069	0.065	0.062	0.058	0.053	0.048	0.045	0.045	0.046	0.051	0.057	0.066	0.077	0.088	0.098	0.107	0.117	0.123	0.129
MES pH 5,5 100uM KZ845	Default	2026.03.22.	16:23	0,000	405	0,008	711	0,451	Measure	USB2G34660BG149	0,980094/-0,89/64/16	NaN	NaN	0.097	0.124	0.116	0.103	0.092	0.076	0.064	0.057	0.052	0.054	0.054	0.05	0.047	0.047	0.046	0.046	0.044	0.041	0.036	0.033	0.029	0.025	0.02	0.018	0.019	0.022	0.025	0.032	0.04	0.051	0.062	0.069	0.077	0.083	0.089	0.094
[truncated: 141 more columns]

## Sheet: MolExt
Conc (µM)	Conc (M)	Abs1	Abs2	Abs3	Abs4	Abs5	Used1	Used2	Used3	Average A
20	2e-05	0.370	0.354	0.375			0.370	0.354	0.375	0.366
40	4e-05	0.502	0.534	0.515			0.502	0.534	0.515	0.517
60	6e-05	0.679	0.642	0.607	0.634	0.644	0.642	0.634	0.644	0.64
80	8e-05	0.785	0.845	0.846	0.715	0.788	0.785	0.788	0.715	0.763
100	0.0001	0.916	0.915	0.927			0.916	0.915	0.927	0.919
											slope	6760
											path length	0.1	cm
											ε	67600	M⁻¹ cm⁻¹
											λ	711	nm

## Sheet: contaminant
Method:	Salamon-BAPTA
Software:	2.8.1
Sample ID	User ID	Date	Time	Measure Type	Gain	Conc.	Units	Min Gain	Max gain ratio	Dilution factor	Norm. coeff.	Formula	RFU	nm1	RFU1	Delta1	nm2	RFU2	Delta2	nm3	RFU3	Delta3	nm4	RFU4	Delta4	Std curve	Std 0 conc	Std 0 RFU	Std 1 conc	Std 1 RFU	Std 2 conc	Std 2 RFU	Std 3 conc	Std 3 RFU	Std 4 conc	Std 4 RFU	Std 5 conc	Std 5 RFU	Std 6 conc	Std 6 RFU	Std 7 conc	Std 7 RFU	Serial number	Firmware	Software	LED	499	503	507
s1 std 0,5mM	Default	2026.04.29.	11:32:00	Measure	10	NaN	uM	10	3	1	1	nm1	181	736	181	NaN	NaN	NaN	NaN	NaN	NaN	NaN	NaN	NaN	NaN	1	NaN	NaN	NaN	NaN	NaN	NaN	NaN	NaN	NaN	NaN	NaN	NaN	NaN	NaN	NaN	NaN	USB2G52067F1273	USB2000 2.50.0 FL1	2.8.1	Blue	667.8	928.6	1198.2
s1 std 0,5mM	Default	2026.04.29.	11:32:00	Measure	10	NaN	uM	10	3	1	1	nm1	156.5	736	156.5	NaN	NaN	NaN	NaN	NaN	NaN	NaN	NaN	NaN	NaN	1	NaN	NaN	NaN	NaN	NaN	NaN	NaN	NaN	NaN	NaN	NaN	NaN	NaN	NaN	NaN	NaN	USB2G52067F1273	USB2000 2.50.0 FL1	2.8.1	Blue	696.7	967	1245
s1 std 0,5mM	Default	2026.04.29.	11:33:00	Measure	10	NaN	uM	10	3	1	1	nm1	168.1	736	168.1	NaN	NaN	NaN	NaN	NaN	NaN	NaN	NaN	NaN	NaN	1	NaN	NaN	NaN	NaN	NaN	NaN	NaN	NaN	NaN	NaN	NaN	NaN	NaN	NaN	NaN	NaN	USB2G52067F1273	USB2000 2.50.0 FL1	2.8.1	Blue	598.3	827.2	1072.9
													168.533
													12.2557
s2 std 0,5mM + Ca	Default	2026.04.29.	11:34:00	Measure	10	NaN	uM	10	3	1	1	nm1	930.2	736	930.2	NaN	NaN	NaN	NaN	NaN	NaN	NaN	NaN	NaN	NaN	1	NaN	NaN	NaN	NaN	NaN	NaN	NaN	NaN	NaN	NaN	NaN	NaN	NaN	NaN	NaN	NaN	USB2G52067F1273	USB2000 2.50.0 FL1	2.8.1	Blue	372.9	553.3	736.7
s2 std 0,5mM + Ca	Default	2026.04.29.	11:34:00	Measure	10	NaN	uM	10	3	1	1	nm1	1056.3	736	1056.3	NaN	NaN	NaN	NaN	NaN	NaN	NaN	NaN	NaN	NaN	1	NaN	NaN	NaN	NaN	NaN	NaN	NaN	NaN	NaN	NaN	NaN	NaN	NaN	NaN	NaN	NaN	USB2G52067F1273	USB2000 2.50.0 FL1	2.8.1	Blue	365.2	514.4	661.3
s2 std 0,5mM + Ca	Default	2026.04.29.	11:34:00	Measure	10	NaN	uM	10	3	1	1	nm1	912.3	736	912.3	NaN	NaN	NaN	NaN	NaN	NaN	NaN	NaN	NaN	NaN	1	NaN	NaN	NaN	NaN	NaN	NaN	NaN	NaN	NaN	NaN	NaN	NaN	NaN	NaN	NaN	NaN	USB2G52067F1273	USB2000 2.50.0 FL1	2.8.1	Blue	317	492.7	659.8
													966.267
													78.4831
s3 std 0,5mM + Zn	Default	2026.04.29.	11:35:00	Measure	10	NaN	uM	10	3	1	1	nm1	322	736	322	NaN	NaN	NaN	NaN	NaN	NaN	NaN	NaN	NaN	NaN	1	NaN	NaN	NaN	NaN	NaN	NaN	NaN	NaN	NaN	NaN	NaN	NaN	NaN	NaN	NaN	NaN	USB2G52067F1273	USB2000 2.50.0 FL1	2.8.1	Blue	321.7	446.5	580.7
s3 std 0,5mM + Zn	Default	2026.04.29.	11:36:00	Measure	10	NaN	uM	10	3	1	1	nm1	218.4	736	218.4	NaN	NaN	NaN	NaN	NaN	NaN	NaN	NaN	NaN	NaN	1	NaN	NaN	NaN	NaN	NaN	NaN	NaN	NaN	NaN	NaN	NaN	NaN	NaN	NaN	NaN	NaN	USB2G52067F1273	USB2000 2.50.0 FL1	2.8.1	Blue	310.7	617.8	785.1
s3 std 0,5mM + Zn	Default	2026.04.29.	11:36:00	Measure	10	NaN	uM	10	3	1	1	nm1	181.4	736	181.4	NaN	NaN	NaN	NaN	NaN	NaN	NaN	NaN	NaN	NaN	1	NaN	NaN	NaN	NaN	NaN	NaN	NaN	NaN	NaN	NaN	NaN	NaN	NaN	NaN	NaN	NaN	USB2G52067F1273	USB2000 2.50.0 FL1	2.8.1	Blue	489.7	681.4	858.3
													240.6
													72.8815
s4 std 0,5mM + Cd	Default	2026.04.29.	11:54:00	Measure	10	NaN	uM	10	3	1	1	nm1	182	736	182	NaN	NaN	NaN	NaN	NaN	NaN	NaN	NaN	NaN	NaN	1	NaN	NaN	NaN	NaN	NaN	NaN	NaN	NaN	NaN	NaN	NaN	NaN	NaN	NaN	NaN	NaN	USB2G52067F1273	USB2000 2.50.0 FL1	2.8.1	Blue	2025.6	1723.1	1645.6
s4 std 0,5mM + Cd	Default	2026.04.29.	11:54:00	Measure	10	NaN	uM	10	3	1	1	nm1	170.7	736	170.7	NaN	NaN	NaN	NaN	NaN	NaN	NaN	NaN	NaN	NaN	1	NaN	NaN	NaN	NaN	NaN	NaN	NaN	NaN	NaN	NaN	NaN	NaN	NaN	NaN	NaN	NaN	USB2G52067F1273	USB2000 2.50.0 FL1	2.8.1	Blue	775.4	858.1	1006.8
s4 std 0,5mM + Cd	Default	2026.04.29.	11:55:00	Measure	10	NaN	uM	10	3	1	1	nm1	180.1	736	180.1	NaN	NaN	NaN	NaN	NaN	NaN	NaN	NaN	NaN	NaN	1	NaN	NaN	NaN	NaN	NaN	NaN	NaN	NaN	NaN	NaN	NaN	NaN	NaN	NaN	NaN	NaN	USB2G52067F1273	USB2000 2.50.0 FL1	2.8.1	Blue	681.8	764.2	903.8
													177.6
													6.05062
s5 std 0,5mM + Ca + Zn	Default	2026.04.29.	11:38:00	Measure	10	NaN	uM	10	3	1	1	nm1	911	736	911	NaN	NaN	NaN	NaN	NaN	NaN	NaN	NaN	NaN	NaN	1	NaN	NaN	NaN	NaN	NaN	NaN	NaN	NaN	NaN	NaN	NaN	NaN	NaN	NaN	NaN	NaN	USB2G52067F1273	USB2000 2.50.0 FL1	2.8.1	Blue	1918.9	1473.5	1046.4
s5 std 0,5mM + Ca + Zn	Default	2026.04.29.	11:39:00	Measure	10	NaN	uM	10	3	1	1	nm1	1185.5	736	1185.5	NaN	NaN	NaN	NaN	NaN	NaN	NaN	NaN	NaN	NaN	1	NaN	NaN	NaN	NaN	NaN	NaN	NaN	NaN	NaN	NaN	NaN	NaN	NaN	NaN	NaN	NaN	USB2G52067F1273	USB2000 2.50.0 FL1	2.8.1	Blue	1859.9	1418.7	1010.6
s5 std 0,5mM + Ca + Zn	Default	2026.04.29.	11:39:00	Measure	10	NaN	uM	10	3	1	1	nm1	1176.7	736	1176.7	NaN	NaN	NaN	NaN	NaN	NaN	NaN	NaN	NaN	NaN	1	NaN	NaN	NaN	NaN	NaN	NaN	NaN	NaN	NaN	NaN	NaN	NaN	NaN	NaN	NaN	NaN	USB2G52067F1273	USB2000 2.50.0 FL1	2.8.1	Blue	1946.4	1513.8	1098.5
													1091.07
													156.004
s6 std 0,5mM + Ca + Cd	Default	2026.04.29.	11:40:00	Measure	10	NaN	uM	10	3	1	1	nm1	1206.4	736	1206.4	NaN	NaN	NaN	NaN	NaN	NaN	NaN	NaN	NaN	NaN	1	NaN	NaN	NaN	NaN	NaN	NaN	NaN	NaN	NaN	NaN	NaN	NaN	NaN	NaN	NaN	NaN	USB2G52067F1273	USB2000 2.50.0 FL1	2.8.1	Blue	417.6	553.9	689.4
s6 std 0,5mM + Ca + Cd	Default	2026.04.29.	11:40:00	Measure	10	NaN	uM	10	3	1	1	nm1	1200.3	736	1200.3	NaN	NaN	NaN	NaN	NaN	NaN	NaN	NaN	NaN	NaN	1	NaN	NaN	NaN	NaN	NaN	NaN	NaN	NaN	NaN	NaN	NaN	NaN	NaN	NaN	NaN	NaN	USB2G52067F1273	USB2000 2.50.0 FL1	2.8.1	Blue	408.3	550.8	691.7
s6 std 0,5mM + Ca + Cd	Default	2026.04.29.	11:41:00	Measure	10	NaN	uM	10	3	1	1	nm1	1181.9	736	1181.9	NaN	NaN	NaN	NaN	NaN	NaN	NaN	NaN	NaN	NaN	1	NaN	NaN	NaN	NaN	NaN	NaN	NaN	NaN	NaN	NaN	NaN	NaN	NaN	NaN	NaN	NaN	USB2G52067F1273	USB2000 2.50.0 FL1	2.8.1	Blue	398.8	541.5	681.7
													1196.2
													12.7542
s7 std 0,5mM + Ca + Zn + Cd	Default	2026.04.29.	11:43:00	Measure	10	NaN	uM	10	3	1	1	nm1	1000.8	736	1000.8	NaN	NaN	NaN	NaN	NaN	NaN	NaN	NaN	NaN	NaN	1	NaN	NaN	NaN	NaN	NaN	NaN	NaN	NaN	NaN	NaN	NaN	NaN	NaN	NaN	NaN	NaN	USB2G52067F1273	USB2000 2.50.0 FL1	2.8.1	Blue	358.1	501.1	646.5
s7 std 0,5mM + Ca + Zn + Cd	Default	2026.04.29.	11:42:00	Measure	10	NaN	uM	10	3	1	1	nm1	902	736	902	NaN	NaN	NaN	NaN	NaN	NaN	NaN	NaN	NaN	NaN	1	NaN	NaN	NaN	NaN	NaN	NaN	NaN	NaN	NaN	NaN	NaN	NaN	NaN	NaN	NaN	NaN	USB2G52067F1273	USB2000 2.50.0 FL1	2.8.1	Blue	1784.9	1291.9	893.4
s7 std 0,5mM + Ca + Zn + Cd	Default	2026.04.29.	11:43:00	Measure	10	NaN	uM	10	3	1	1	nm1	999.8	736	999.8	NaN	NaN	NaN	NaN	NaN	NaN	NaN	NaN	NaN	NaN	1	NaN	NaN	NaN	NaN	NaN	NaN	NaN	NaN	NaN	NaN	NaN	NaN	NaN	NaN	NaN	NaN	USB2G52067F1273	USB2000 2.50.0 FL1	2.8.1	Blue	1845.8	1380	1000
													967.533
													56.7557
[truncated: 61 more columns]

## Sheet: Raw Data
Solomon-red-BAPTA — Selectivity Experiment Raw Data (736 nm, NanoDrop 3300)
S1–S7: measured 2026-04-29, session 1 | S8–S10: measured 2026-04-29, session 2 (aged dye stock — see notes)
Sample ID	Condition	Ca²⁺ (mM)	Competitor	Conc. (mM)	Rep 1 (RFU)	Rep 2 (RFU)	Rep 3 (RFU)	Mean (RFU)	SD (RFU)	Fold vs ctrl	Notes
S1	Dye only (control)	0	—	0	181	156.5	168.1	168.533	12.2557	1	Baseline; session 1
S2	Ca²⁺	0.2	—	0	930.2	1056.3	912.3	966.267	78.4831	5.73339	Session 1
S3	Zn²⁺	0	Zn²⁺	0.02	322	218.4	181.4	240.6	72.8815	1.42761	Session 1
S4	Cd²⁺	0	Cd²⁺	0.02	182	170.7	180.1	177.6	6.05062	1.0538	Session 1; remeasured
S5	Ca²⁺ + Zn²⁺	0.2	Zn²⁺	0.02	911	1185.5	1176.7	1091.07	156.004	6.47389	Session 1
S6	Ca²⁺ + Cd²⁺	0.2	Cd²⁺	0.02	1206.4	1200.3	1181.9	1196.2	12.7542	7.09771	Session 1
S7	Ca²⁺ + Zn²⁺ + Cd²⁺	0.2	Zn²⁺,Cd²⁺	0.02	999.8	820.1	1000.8	940.233	104.04	5.57892	Session 1; last 3 of 5 used
S8	Hg²⁺	0	Hg²⁺	0.02	128.8	126.3	135.2	130.1	4.59021	0.771954	Session 2; aged dye
S9	Ca²⁺ + Hg²⁺	0.2	Hg²⁺	0.02	907	925	940	924	16.5227	5.48259	Session 2; aged dye
S10	Ca²⁺+Zn²⁺+Cd²⁺+Hg²⁺	0.2	Zn²⁺,Cd²⁺,Hg²⁺	0.02	1245.2	1246.5	1288	1259.9	24.344	7.47567	Session 2; aged dye
NOTES: [Dye] = 0.5 mM final (1 mM stock in MeCN, 1:1 dilution with MOPS buffer); [Ca²⁺] = 0.2 mM; Competitors = 0.02 mM (1/10th Ca²⁺). Blank = 30 mM MOPS / 100 mM KCl pH 6.8. Excitation: blue LED ~470 nm (NanoDrop 3300). Emission recorded at 736 nm. S8–S10: measured with aged dye stock in a separate session; Hg²⁺ alone (S8) shows mild quenching below baseline consistent with heavy-atom effect. No…

## Sheet: Summary Statistics
Solomon-red-BAPTA — Summary Statistics & Selectivity Analysis
Sample	Condition	Mean RFU	SD (RFU)	Fold vs Control	% Signal retention vs Ca²⁺ alone	Session
S1	Dye only (control)	168.533	12.2557	1	17.4417	Session 1
S2	Ca²⁺	966.267	78.4831	5.73339	100	Session 1
S3	Zn²⁺	240.6	72.8815	1.42761	24.9	Session 1
S4	Cd²⁺	177.6	6.05062	1.0538	18.38	Session 1
S5	Ca²⁺ + Zn²⁺	1091.07	156.004	6.47389	112.916	Session 1
S6	Ca²⁺ + Cd²⁺	1196.2	12.7542	7.09771	123.796	Session 1
S7	Ca²⁺ + Zn²⁺ + Cd²⁺	940.233	104.04	5.57892	97.3058	Session 1
S8	Hg²⁺	130.1	4.59021	0.771954	13.4642	Session 2 (aged dye)
S9	Ca²⁺ + Hg²⁺	924	16.5227	5.48259	95.6258	Session 2 (aged dye)
S10	Ca²⁺+Zn²⁺+Cd²⁺+Hg²⁺	1259.9	24.344	7.47567	130.388	Session 2 (aged dye)

## Sheet: Spectroscopic Properties
Solomon-red-BAPTA — Spectroscopic & Photophysical Properties
Parameter	Value	Unit	Notes
Absorption maximum (λabs)	712	nm	NanoDrop 1100; MOPS buffer pH 6.8
Emission maximum (λem)	736	nm	NanoDrop 3300; blue LED excitation ~470 nm
Stokes shift	24	nm	λem − λabs
Molar extinction coefficient (ε)	67600	M⁻¹cm⁻¹	Beer–Lambert; 1 mm path; 20–100 µM series; R² linear
Quantum yield — Ca²⁺-saturated (Φsat)	~0.4	—	Approximate; Rhodamine 6G ref (Φ=0.95); Δλem >180 nm mismatch; see notes
Lifetime — Ca²⁺-free (τfree)	~0.5	ns	TCSPC; Edinburgh FLS 980; 50% MeCN/MOPS buffer; estimated aqueous value
Lifetime — Ca²⁺-bound (τbound)	~1.8	ns	TCSPC; Edinburgh FLS 980; 50% MeCN/MOPS buffer; estimated aqueous value
Lifetime ratio (τbound/τfree)	~3.6×	—	Consistent with PET quenching mechanism
Apparent binding constant (pKd)	5.7	—	Ca²⁺; competitive fluorescent titration; Kd ~2 µM
Dynamic range	0.3–10	µM	Linear fluorescence response range for Ca²⁺
Ca²⁺ signal fold-increase	~160×	—	From Edinburgh FLS 980 synchronous scan (original manuscript data)
Cd²⁺ signal fold-increase	~140×	—	From Edinburgh FLS 980 synchronous scan
Zn²⁺ signal fold-increase	~62×	—	From Edinburgh FLS 980 synchronous scan
pH stability range	6.5–8.5	—	MES/HEPES/Tris buffers; NanoDrop 1100; 100 µM dye
Dye stock solvent	MeCN	—	Stable in MeCN and water; avoid DMSO
⚠ Highlighted rows: values are preliminary estimates. Full photophysical characterization (QY with NIR-matched reference, lifetime in fully aqueous buffer) is beyond the scope of this proof-of-concept study.
